# Supplementary material for: Spatiotemporal trends of ischemic stroke burden attributable to PM2.5 from 1990 to 2021
Source: Front Public Health. 2025 Jul 16;13:1608086. doi: 10.3389/fpubh.2025.1608086 (PMC12307462; doi:10.3389/fpubh.2025.1608086)
Supplement: Supplementary file 18 [file Table_5.xlsx]

## Sheet: apmdf_num_asr_90_21_eapc
Table S5. The global burden of ischemic stroke attributable to ambient PM2.5 air pollution in 1990 and 2021 and the temporal trends during 1990-2021
Characteristics	1990				2021				EAPC of ASMR No. (95% CI)	EAPC of ASDR No. (95% CI)
	Death number No. × 104 (95% UI)	DALY No. × 104 (95% UI)	ASMR per 100000 No. (95% UI)	ASDR per 100000 No. (95% UI)	Death number No. × 104 (95% UI)	DALY No. × 104 (95% UI)	ASMR per 100000 No. (95% UI)	ASDR per 100000 No. (95% UI)
Global	31.30 (22.10-42.55)	599.59 (423.05-813.09)	9.94 (7.02-13.40)	169.47 (119.47-229.77)	60.31 (41.84-75.87)	1199.86 (833.88-1513.70)	7.37 (5.12-9.26)	141.82 (98.69-178.97)	-0.85 (-0.98 to -0.73)	-0.45 (-0.58 to -0.32)
Female	17.53 (12.48-23.62)	307.88 (218.40-412.02)	9.40 (6.72-12.76)	153.98 (109.87-205.37)	28.00 (19.05-36.13)	531.23 (356.03-676.77)	5.96 (4.05-7.69)	114.35 (76.60-145.63)	-1.46 (-1.58 to -1.34)	-0.92 (-1.05 to -0.80)
Male	13.77 (9.54-18.70)	291.70 (202.29-397.59)	10.49 (7.32-14.09)	186.64 (130.17-253.61)	32.31 (22.19-41.08)	668.63 (459.49-855.01)	9.20 (6.34-11.66)	174.96 (120.19-223.59)	-0.20 (-0.35 to -0.05)	0.00 (-0.15 to 0.15)
Low SDI	0.68 (0.42-1.02)	15.55 (9.64-23.23)	4.50 (2.77-6.81)	82.99 (51.66-122.93)	1.63 (1.02-2.40)	36.10 (22.65-52.86)	4.62 (2.87-6.73)	84.07 (52.58-122.01)	0.51 (0.19 to 0.83)	0.41 (0.12 to 0.70)
Low-middle SDI	2.51 (1.57-3.67)	54.66 (34.33-80.10)	5.73 (3.6-8.32)	104.47 (65.66-152.38)	8.89 (5.50-12.50)	189.83 (120.03-264.51)	7.63 (4.7-10.77)	143.99 (90.61-201.86)	1.18 (1.01 to 1.36)	1.27 (1.10 to 1.43)
Middle SDI	5.32 (3.34-7.81)	117.86 (74.34-174.36)	7.39 (4.65-10.81)	133.80 (84.88-197.87)	24.66 (15.64-31.28)	502.70 (316.66-634.79)	10.82 (6.85-13.74)	201.25 (126.82-253.51)	1.66 (1.46 to 1.85)	1.73 (1.54 to 1.92)
High-middle SDI	14.56 (9.58-20.52)	269.76 (177.55-383.11)	18.49 (12.26-25.85)	303.53 (201.18-430.38)	19.89 (14.27-25.33)	374.52 (269.31-481.12)	10.27 (7.38-13.07)	190.25 (137.02-244.31)	-1.91 (-2.06 to -1.76)	-1.51 (-1.67 to -1.34)
High SDI	8.17 (5.40-11.99)	140.60 (93.25-202.97)	7.34 (4.85-10.78)	125.00 (83.03-180.40)	5.19 (3.75-6.86)	95.79 (71.34-123.57)	2.07 (1.52-2.73)	43.72 (32.90-55.87)	-4.29 (-4.41 to -4.17)	-3.57 (-3.67 to -3.47)
High-income Asia Pacific	1.15 (0.31-2.35)	21.69 (6.09-42.83)	6.72 (1.79-13.81)	116.07 (32.19-230.45)	1.21 (0.70-1.83)	20.59 (12.19-30.71)	1.74 (1.03-2.60)	37.97 (23.26-56.41)	-4.86 (-5.23 to -4.48)	-4.10 (-4.48 to -3.72)
High-income North America	1.03 (0.40-1.84)	18.65 (7.19-32.58)	2.76 (1.06-4.92)	50.77 (19.56-88.78)	0.40 (0.20-0.67)	7.51 (3.60-12.33)	0.53 (0.26-0.89)	10.94 (5.23-18.00)	-6.08 (-6.54 to -5.62)	-5.66 (-6.09 to -5.23)
Central Asia	0.42 (0.16-0.80)	9.14 (3.61-17.56)	10.43 (4.07-19.89)	207.37 (82.21-398.19)	0.76 (0.52-1.01)	16.90 (11.57-22.59)	11.99 (8.20-15.79)	231.40 (158.14-307.52)	0.74 (0.36 to 1.11)	0.58 (0.25 to 0.92)
East Asia	4.57 (2.15-8.40)	104.01 (49.56-191.29)	7.75 (3.58-14.13)	141.82 (65.88-259.63)	29.86 (19.56-38.55)	592.04 (385.10-761.02)	15.69 (10.29-20.17)	286.06 (186.84-367.43)	3.06 (2.50 to 3.63)	3.05 (2.55 to 3.55)
South Asia	1.40 (0.67-2.45)	32.07 (15.52-56.46)	3.51 (1.68-6.07)	65.85 (31.81-115.75)	7.44 (4.24-10.90)	156.86 (90.12-233.67)	6.36 (3.64-9.20)	117.30 (67.35-173.18)	2.09 (1.68 to 2.50)	2.00 (1.63 to 2.37)
Southeast Asia	1.06 (0.46-1.98)	24.59 (10.58-45.72)	5.76 (2.46-10.84)	111.05 (47.53-207.37)	4.48 (2.65-6.29)	96.21 (57.13-134.86)	8.95 (5.23-12.43)	166.48 (99.50-232.24)	1.26 (1.10 to 1.41)	1.09 (0.95 to 1.24)
Central Europe	3.32 (1.70-5.38)	58.45 (29.68-94.34)	25.85 (13.25-41.85)	419.43 (213.20-676.74)	2.09 (1.52-2.66)	33.69 (24.69-42.58)	8.55 (6.21-10.88)	142.54 (104.51-180.16)	-3.56 (-3.87 to -3.25)	-3.48 (-3.79 to -3.18)
Eastern Europe	7.86 (3.71-12.44)	143.47 (68.49-228.10)	32.60 (15.29-51.59)	545.77 (259.59-866.06)	2.79 (1.77-4.22)	48.35 (30.53-72.95)	7.71 (4.89-11.64)	135.18 (85.45-203.70)	-5.57 (-6.02 to -5.12)	-5.40 (-5.84 to -4.96)
Western Europe	5.63 (2.72-9.29)	86.16 (41.67-145.01)	9.27 (4.48-15.34)	141.15 (68.24-237.33)	1.49 (0.99-2.12)	22.37 (15.14-31.12)	1.15 (0.77-1.64)	19.84 (13.37-27.56)	-6.89 (-7.06 to -6.73)	-6.48 (-6.62 to -6.35)
Andean Latin America	0.13 (0.06-0.21)	2.52 (1.20-3.98)	7.58 (3.54-12.12)	133.93 (63.43-210.86)	0.17 (0.11-0.25)	3.09 (1.98-4.60)	3.04 (1.92-4.59)	54.11 (34.75-80.54)	-3.66 (-4.05 to -3.26)	-3.62 (-3.99 to -3.26)
Central Latin America	0.43 (0.23-0.69)	8.26 (4.30-13.24)	6.67 (3.52-10.82)	112.59 (58.66-181.16)	0.44 (0.30-0.59)	8.05 (5.48-10.73)	1.89 (1.29-2.56)	33.72 (22.91-44.93)	-4.23 (-4.43 to -4.02)	-4.12 (-4.31 to -3.93)
Southern Latin America	0.30 (0.14-0.50)	5.35 (2.48-9.38)	7.27 (3.38-12.38)	122.77 (56.78-214.34)	0.23 (0.13-0.35)	4.07 (2.32-6.27)	2.45 (1.38-3.78)	44.92 (25.60-69.26)	-3.42 (-3.63 to -3.21)	-3.29 (-3.49 to -3.08)
Tropical Latin America	0.51 (0.19-1.02)	10.18 (3.74-20.17)	7.34 (2.63-14.66)	126.63 (46.38-251.83)	0.58 (0.33-0.89)	10.39 (5.87-15.98)	2.38 (1.35-3.67)	41.74 (23.60-64.23)	-3.58 (-3.78 to -3.37)	-3.66 (-3.85 to -3.48)
Australasia	0.04 (0.00-0.11)	0.61 (0.02-1.78)	1.72 (0.06-5.01)	26.65 (0.91-78.10)	0.05 (0.03-0.07)	0.74 (0.43-1.12)	0.70 (0.40-1.07)	12.34 (7.10-18.56)	-3.58 (-4.09 to -3.06)	-3.18 (-3.74 to -2.61)
Caribbean	0.12 (0.04-0.25)	2.15 (0.74-4.43)	5.35 (1.85-10.84)	88.29 (30.52-181.00)	0.24 (0.12-0.39)	4.03 (2.05-6.62)	4.30 (2.20-7.04)	74.33 (37.89-122.27)	-0.56 (-0.68 to -0.44)	-0.38 (-0.52 to -0.25)
North Africa and Middle East	2.47 (1.68-3.25)	53.03 (36.14-69.60)	20.28 (13.73-26.7)	362.26 (246.25-475.89)	6.06 (4.57-7.52)	129.80 (97.79-162.15)	17.34 (13.11-21.5)	316.91 (239.37-392.94)	-0.35 (-0.49 to -0.21)	-0.31 (-0.47 to -0.15)
Oceania	0.00 (0.00-0.01)	0.08 (0.02-0.19)	1.89 (0.54-4.74)	35.72 (10.30-86.14)	0.01 (0.00-0.02)	0.24 (0.08-0.54)	2.13 (0.73-4.85)	40.72 (14.39-92.10)	0.16 (-0.03 to 0.35)	0.20 (0.02 to 0.39)
Central Sub-Saharan Africa	0.05 (0.03-0.08)	1.15 (0.61-1.90)	3.76 (1.98-6.42)	68.82 (37.02-115.41)	0.14 (0.08-0.21)	3.26 (1.90-4.94)	4.37 (2.53-6.57)	79.73 (46.41-119.20)	0.81 (0.51 to 1.10)	0.85 (0.56 to 1.14)
Eastern Sub-Saharan Africa	0.09 (0.06-0.14)	2.18 (1.38-3.31)	1.93 (1.19-2.94)	36.26 (22.74-54.21)	0.25 (0.15-0.39)	5.76 (3.46-8.83)	2.25 (1.34-3.48)	42.10 (25.05-64.14)	0.95 (0.80 to 1.10)	0.93 (0.78 to 1.08)
Southern Sub-Saharan Africa	0.13 (0.08-0.18)	2.85 (1.75-3.94)	6.11 (3.80-8.61)	118.14 (72.60-164.73)	0.33 (0.22-0.45)	6.92 (4.67-9.29)	8.07 (5.28-11.08)	143.15 (96.34-192.76)	1.29 (0.86 to 1.72)	0.98 (0.59 to 1.37)
Western Sub-Saharan Africa	0.60 (0.33-0.94)	12.98 (7.27-20.14)	9.31 (5.07-14.83)	170.85 (95.38-265.04)	1.31 (0.74-2.06)	29.02 (16.32-45.30)	9.69 (5.45-15.10)	175.87 (98.97-272.75)	0.89 (0.50 to 1.28)	0.83 (0.45 to 1.21)
ASMR, age-standardized mortality rate; UI, uncertainty interval; DALYs, disability-adjusted life years; ASDR, age-standardized DALY rate; EAPC, estimated annual percentage change; CI, confidence interval; SDI, Socio-demographic Index
